# 1 **pOPIN-GG: A resource for modular assembly in protein expression**

## 2 **vectors**

3

4 Adam R. Bentham<sup>1,\*</sup>, Mark Youles<sup>2,\*</sup>, Melanie N. Mendel<sup>1,3</sup>, Freya A. Varden<sup>1</sup>, Juan Carlos De  
5 la Concepcion<sup>1,4</sup>, Mark J. Banfield<sup>1</sup>

6 <sup>1</sup> Department of Biochemistry and Metabolism, John Innes Centre, Norwich Research Park,  
7 Norwich, NR4 7UH, UK

8 <sup>2</sup> The Sainsbury Laboratory, University of East Anglia, Norwich Research Park, NR4 7UH,  
9 Norwich, UK

10 <sup>3</sup> Current address: Plant-Microbe Interactions, Utrecht University, Padualaan 8, Utrecht,  
11 3584CH, Netherlands

12 <sup>4</sup> Current address: Gregor Mendel Institute of Molecular Plant Biology, Austrian Academy of  
13 Sciences, Vienna, 1030, Austria

14 Corresponding author email: [adam.bentham@jic.ac.uk](mailto:adam.bentham@jic.ac.uk), [mark.banfield@jic.ac.uk](mailto:mark.banfield@jic.ac.uk)

15 \* Contributed equally to this work.

16

17 ORCIDs:

18 Adam R. Bentham: 0000-0001-5906-0962

19 Melanie N. Mendel: 0000-0003-2409-7479

20 Freya A. Varden: 0000-0003-4224-2326

21 Juan Carlos De la Concepcion: 0000-0002-7642-8375

22 Mark J. Banfield: 0000-0001-8921-3835

## 23 **Highlights**

- 24 • pOPIN-GG expression vectors allow for modular cloning enabling rapid screening of  
25 purification and solubility tags at no loss of expression compared to previous vectors.
- 26 • Cloning into the pOPIN-GG vectors can be performed from PCR products or from level  
27 0 vectors containing the required parts.
- 28 • Several vectors with different resistances and origins of replication have been  
29 generated allowing the effective co-expression and purification of protein complexes.
- 30 • All pOPIN-GG vectors generated here are available on Addgene, as well as level 0  
31 acceptors and tags.

32

## 33 **Keywords**

34 Modular cloning, Golden Gate, high-throughput protein expression, solubility tags, co-  
35 purification

36

37 **Word Count: 3,448** (Abstract, Introduction, Results, Discussion, Experimental Procedures,  
38 Acknowledgements, Data availability statement and Figure Legends)

39 **Abstract**

40 The ability to recombinantly produce target proteins is essential to many biochemical,  
41 structural, and biophysical assays that allow for interrogation of molecular mechanisms behind  
42 protein function. Purification and solubility tags are routinely used to maximise the yield and  
43 ease of protein expression and purification from *E. coli*. A major hurdle in high-throughput  
44 protein expression trials is the cloning required to produce multiple constructs with different  
45 solubility tags. Here we report a modification of the well-established pOPIN expression vector  
46 suite to be compatible with modular cloning via Type IIS restriction enzymes. This allows users  
47 to rapidly generate multiple constructs with any desired tag, introducing modularity in the  
48 system and delivering compatibility with other modular cloning vector systems, for example  
49 streamlining the process of moving between expression hosts. We demonstrate these  
50 constructs maintain the expression capability of the original pOPIN vector suite and can also  
51 be used to efficiently express and purify protein complexes, making these vectors an excellent  
52 resource for high-throughput protein expression trials.

## 53 **Introduction**

54 Understanding protein function is key to answering many biological questions. Biochemical,  
55 structural, and biophysical techniques that probe the molecular mechanisms behind protein  
56 function are reliant on the production of purified protein for use in these assays. Procedures  
57 for protein expression and purification from *Escherichia coli* have been advanced by  
58 methodologies which allow for the high-throughput generation of constructs (Rosano and  
59 Ceccarelli, 2014). Intrinsic to generating soluble protein of the more difficult targets in *E. coli*  
60 is the capacity to test multiple solubility tags, such as the Small Ubiquitin-like modifier (SUMO)  
61 or the Maltose Binding Protein (MBP) tags, which allow for the production of proteins that  
62 would be otherwise insoluble (di Guana et al., 1988; Malakhov et al., 2004). Further, the use  
63 of purification tags frequently allows for rapid capture of proteins of interest from cell lysates.  
64 However, purification and solubility tags are often vector-linked, encoded in the expression  
65 vector upstream of the cloning site of the target gene. As such, the lack of modularity of  
66 purification and solubility tags in expression vectors presents a bottleneck in high-throughput  
67 expression screens as the user is limited to the solubility tags encoded in the vectors available  
68 to them. Therefore, tackling the problem of modularity represents an opportunity to increase  
69 the efficiency of expression trials, and readily allows for the incorporation of novel purification  
70 and solubility tags as they are developed.

71

72 The pOPIN vector suite, generated by the Oxford Protein Production Facility (OPPF), is a set  
73 of expression vectors encoding various purification and solubility tags at either the N- or C-  
74 terminus of the gene of interest (GOI) (Berrow et al., 2007). These vectors allow for a  
75 straightforward cloning method via ligation independent cloning (LIC) and rapid generation of  
76 constructs. Furthermore, the pOPIN vectors are compatible with multiple hosts, with many  
77 being able to be used in bacterial, insect and mammalian cell hosts (Berrow et al., 2007). One  
78 shortcoming of these excellent vectors is a lack of modularity, meaning users are restricted to  
79 the solubility tags provided in the vector suite.

80

81 Golden Gate cloning (also known as Greengate cloning or MoClo) represents a fast and  
82 efficient method of cloning genes through the use of Type IIS restriction endonucleases that  
83 cut outside their recognition site to reveal user defined four nucleotide overhangs at both the  
84 5' and 3' ends of the DNA (Engler et al., 2008). These overhangs can be exploited to allow  
85 scarless cloning, as well as for design and assembly of multiple DNA fragments in a single  
86 ligation reaction (Padgett and Sorge, 1996). They also allow for efficient subcloning between  
87 vectors (Engler et al., 2008). Golden Gate cloning allows for the generation of diverse “level  
88 0” parts, which can be promoters, the GOI, terminators, epitope tags etc. These can then be  
89 assembled into “level 1” expression cassettes, which themselves can be further cloned along  
90 with other level 1 expression cassettes to give rise to “level 2” multi-gene assemblies.  
91 Moreover, the scarless nature of Golden Gate cloning makes the technique excellent for  
92 synthetic design approaches such as assembling chimeric proteins, allowing the generation  
93 of protein domain-swaps, or tagging proteins. Due to its high efficiency, modularity, and well  
94 established sequential cloning strategy, Golden Gate cloning has been incorporated in  
95 multiple vector systems for eukaryotic expression, such as plants or insect cells (Engler et al.,  
96 2014, 2009; Neuhold et al., 2020).

97

98 Here, we present a modified pOPIN vector suite we call pOPIN-GG that takes advantage of  
99 Golden Gate cloning (Engler et al., 2009, 2008) to incorporate modularity into the pOPIN  
100 vectors without disrupting efficacy of expression. These vectors also allow cross-compatibility  
101 with other Golden Gate systems, such as plant expression binary vectors (Engler et al., 2014;  
102 Patron et al., 2015), and simple one-pot reactions which allow for the bespoke construction of  
103 expression vectors containing the GOI and desired purification or solubility tags. We  
104 demonstrate that the pOPIN-GG vectors express comparable levels of protein to those of the  
105 classic pOPIN suite, whilst also enabling the user to selectively vary the choice of tags. This  
106 incorporation of modularity in protein expression supplied by pOPIN-GG vectors further

107 advances high-throughput protein expression trials and subsequent preparative purification in  
108 *E. coli*.

## 109 **Results**

### 110 *Cloning into the pOPIN-GG vectors.*

111 Cloning into the pOPIN-GG vectors follows standard Golden Gate protocols where matching  
112 overhangs between acceptor vector and inserts, revealed by digestion with a Type IIS  
113 endonuclease, *BsaI*, are ligated with T4 ligase (Engler et al., 2009, 2008). Here, we have  
114 engineered two sets of overhangs into the pOPIN-GG vectors: 5' CCAT and 3' GCTT for  
115 pOPIN-GG N-terminal tag compatible vectors (pPGN), and 5' AATG and 3' GCTT overhangs  
116 for pOPIN-GG C-terminal tag compatible vectors (pPGC). The pPGN and pPGC vectors have  
117 been developed with two different options for antibiotic selection, carbenicillin (the pPGN-C  
118 and pPGC-C vectors) and kanamycin (the pPGN-K and pPGC-K vectors), which allows for  
119 co-expression via bacterial co-transformation. Annotated vector maps of these pOPIN-GG  
120 acceptors are shown in Figure 1, detailing the changes made to the original pOPIN-F and  
121 pOPIN-A vectors (the modifications are further described in the experimental procedures).

122 Cloning of GOIs into the pOPIN-GG vectors are based on a common syntax for Type IIS  
123 endonuclease-mediated assembly (Patron et al., 2015). For cloning of N-terminally tagged  
124 GOIs into pPGN, the desired N-terminal tag must have the overhangs 5' CCAT and 3' AATG,  
125 and the GOI have the overhangs 5' AATG and 3' GCTT, when revealed by digestion with *BsaI*.  
126 For cloning into pPGC, the GOI requires the overhangs 5' AATG and 3' TTCG and the C-  
127 terminal tag must have the overhangs 5' TTCG and 3' GCTT. In addition, a GOI encoding an  
128 untagged protein can be cloned by using the 5' AATG and 3' GCTT overhangs and one of the  
129 C-terminal tagging compatible pPGC vectors, which contain the 5'AATG and 3' GCTT  
130 overhangs. Figure 2 visualises the compatible overhangs between vector, tag and insert for  
131 cloning to produce N-terminally tagged, C-terminally tagged, and untagged proteins.  
132 Overhangs can be introduced into a desired sequence through either PCR with primers  
133 containing overhangs and a *BsaI* site (Table 1), or through *BsaI*-digestion of a compatible level  
134 0 entry vector containing either tag or insert of interest. This highlights a major advantage of  
135 the pOPIN-GG vectors, by which a single PCR amplification or level 0 vector containing the

136 GOI with the appropriate N-terminal or C-terminal tagging overhangs can be used for multiple  
137 simultaneous digestion-ligation reactions as the overhangs remain universal between  
138 acceptor, tag, and insert. pOPIN-GG acceptors along with multiple level 0 vectors containing  
139 N-terminal and C-terminal tags with the necessary overhangs for cloning are listed in Table 2.

140

141 *The pOPIN-GG vectors maintain protein expression levels comparable to the original pOPIN*  
142 *vectors.*

143 To test the efficacy of the pOPIN-GG vectors for protein expression, we cloned AVR-PikF (a  
144 small, secreted effector protein from the blast fungus *Magnaporthe oryzae* (Longya et al.,  
145 2019)), into the vectors pOPIN-F (N-terminal 6xHIS-3C), pOPIN-S3C (N-terminal 6xHIS-  
146 SUMO-3C), pOPIN-M (N-terminal 6xHIS-MBP-3C) and pOPIN-E (C-terminal 6xHIS  
147 uncleavable), and generated the equivalent constructs using our pOPIN-GG system (see  
148 experimental procedures). We also cloned AVR-PikF with a 6xHIS-GB1 solubility tag  
149 (Kobashigawa et al., 2009), to which we did not have access to the pOPIN equivalent, to  
150 demonstrate the adaptability of the pOPIN-GG system. Figure 3 shows a comparison between  
151 AVR-PikF expressed in the *E. coli* SHuffle strain using the gene cloned in the original pOPIN  
152 vectors and the pOPIN-GG vectors and after benchtop Ni<sup>2+</sup>-immobilised metal affinity  
153 chromatography (IMAC) purification. We observed no significant differences in the yield of  
154 protein between the pOPIN vectors and new pOPIN-GG vectors, demonstrating the pOPIN-  
155 GG vectors retain the same capacity for protein production as the parent vectors.

156

157 *The pOPIN-GG vectors are compatible with co-expression.*

158 To further demonstrate the flexibility of the pOPIN-GG vectors, we next cloned an interaction  
159 partner of AVR-PikF, OsHIPP19 (Maidment et al., 2021), into pPGN-C with a 6xHIS-GB1 tag.  
160 We co-transformed *E. coli* SHuffle cells with the 6xHIS-GB1-OsHIPP19 vector and an  
161 untagged variant of AVR-PikF (in pPGC-K), expressed the proteins, and performed Ni<sup>2+</sup>-IMAC  
162 coupled with size exclusion chromatography (SEC) to purify a complex between AVR-PikF  
163 and OsHIPP19 (Figure 4). SDS-PAGE shows both proteins are expressed and purified, with



- 164 AVR-PikF co-purified along with OsHIPP19 (Figure 4). These results demonstrate the pOPIN-
- 165 GG vectors can be used for efficient expression and purification of protein complexes.

## 166 **Discussion**

167 The ability to test multiple purification and solubility tags in *E. coli* expression trials is important  
168 for determining the best conditions for protein production. High-throughput expression trials  
169 allow the user to explore potential avenues for successful protein production, and a key step  
170 is the ability to clone the gene of interest easily and effectively into a variety of constructs with  
171 different purification and solubility tags. Here we describe pOPIN-GG, a modification of the  
172 pOPIN vector suite, which allows for modular cloning using Golden Gate. The redesigned  
173 pOPIN-GG vector suite retains the expression levels of the pOPIN vectors (with the proteins  
174 we tested) while enhancing their modularity. A major advantage of the pOPIN-GG system is it  
175 allows for the rapid introduction new purification and solubility tags as they emerge, in a  
176 straightforward and easy to clone manner. The different pOPIN-GG acceptors are cross-  
177 compatible for co-expression, allowing for ease of co-expression and purification of protein  
178 complexes. Finally, the utility of the pOPIN-GG vectors presented here have already been  
179 successfully tested by the community for the expression and purification of a fungal effector  
180 from *Parastagonospora nodorum* (Outram et al., 2021), as well as for detailing the structural  
181 mechanisms underpinning the evolution of *Magnaporthe oryzae* effectors for a specific host  
182 target (Bentham et al., 2021).

## 183 **Conclusions**

184 The pOPIN vector suite is a well-established and effective *E. coli* vector system for protein  
185 expression and purification. By modifying the pOPIN vectors to be Golden Gate compatible  
186 we have introduced modularity to the system, providing the user with the advantages of  
187 modular cloning and allowing the incorporation new purification and solubility tags to the vector  
188 repertoire, streamlining the vector assembly step, with no cost to the expression efficacy of  
189 the system. We have made the pOPIN-GG vectors available on Addgene  
190 ([https://www.addgene.org/Mark\\_Banfield](https://www.addgene.org/Mark_Banfield)) as a package with level 0 and level 1 acceptors,  
191 and level 0 N-terminal and C-terminal tag constructs.

## 192 **Experimental Procedures**

### 193 *Domestication and modification of the pOPIN vectors to generate the pOPIN-GG vectors*

194 We used the pOPIN-F vector (Berrow et al., 2007) as template to generate Golden Gate  
195 compatible versions of the pOPIN vectors, making considerable effort to minimise alterations  
196 to the existing pOPIN-F vector backbone. To adapt pOPIN-F to the Golden Gate cloning  
197 system, we removed all of the native Type IIS *BsaI* and *BpiI* restriction sites from the  
198 sequence, a process traditionally termed 'domestication'. After domestication, we generated  
199 two different antibiotic resistance variants (carbenicillin and kanamycin) conducive to the need  
200 for dual protein co-expression. We then took the carbenicillin resistant ( $\text{Carb}^R$ ) and kanamycin  
201 resistant ( $\text{Kan}^R$ ) vectors and engineered two variants for each to allow for the insertion GOIs  
202 compatible with either N-terminal or C-terminal tags. To do this, we reintroduced two *BsaI*  
203 sites between the T7 promoter and terminator, which would yield 5' CCAT and 3' GCTT  
204 nucleotide overhangs for the N-terminal tag compatible vectors, and 5' AATG and 3' GCTT  
205 overhangs in the C-terminal tag compatible vectors post treatment with *BsaI* (Figure 1).  
206 Ultimately, we developed four pOPIN-GG acceptor vectors, pPGN-C ( $\text{Carb}^R$ ) and pPGN-K  
207 ( $\text{Kan}^R$ ) for N-terminal tagging, and pPGC-C ( $\text{Carb}^R$ ) and pPGC-K ( $\text{Kan}^R$ ) for C-terminal tagging  
208 (Table 1). Further, to assist with positive clone identification, we introduced a visible red  
209 fluorescent protein (RFP) negative selection marker, allowing users to select positive white  
210 colonies after transformation. Importantly, the  $\text{Carb}^R$  and  $\text{Kan}^R$  versions of the acceptors also  
211 contain different origins of replication to allow for efficient co-expression in addition to co-  
212 transformation.

213

214 To overcome complications with PCR (polymerase read-through in the native pOPIN-F  
215 vector), we removed a 15xG homopolymer string by excising a 947bp (*EagI-SacII*) section of  
216 vector backbone using traditional restriction enzymes and stored this for later use. As a  
217 consequence of increased Golden Gate assembly efficiency from cloned (i.e. non-linear)  
218 fragments, the remaining sections of the backbone (incorporating changes to the native  
219  $2\times\text{BsaI}$  and  $2\times\text{BpiI}$  restriction sites) were amplified by PCR and cloned into custom level 0

220 acceptors. Once independently sub-cloned, the mutated fragments could subsequently be re-  
221 assembled (along with the *EagI-SacII* cassette), eliminating all the existing *BsaI* and *Bpil*  
222 restriction sites to generate a fully domesticated version of the original pOPIN-F vector.

223

224 Following domestication, larger sections of the vector back-bone could be re-cloned into  
225 additional custom level 0 acceptors to enable a pre-domesticated iGEM RFP negative  
226 selection reporter cassette (originating from *Discosoma striata*) to be inserted in place of the  
227 pOPIN-F N-terminal 6xHIS tag and Lac operon (LacZ) negative selection elements. The  
228 border sequences immediately flanking this region were found to be important for protein  
229 expression and were modified to directly mimic those of the native pOPIN vectors. Final vector  
230 assembly was achieved by ligating vector back-bone fragments together along with the *EagI*-  
231 *SacII* and RFP negative selection reporter elements. Changes to the Golden Gate cloning  
232 insert overhangs, and exchange of the vector bacterial antibiotic resistance, were achieved by  
233 making the necessary modifications to the respective level 0 assembly components.

234

235 *Cloning of AVR-PikF into pOPIN and pOPIN-GG vectors for test expression and purification*

236 The AVR-PikF coding sequence (encoding residues starting from the end of the signal peptide  
237 21 – 113) was cloned into pOPIN and pOPIN-GG vectors via Infusion cloning and Golden  
238 Gate, respectively. Infusion cloning of AVR-PikF in the pOPIN vectors, pOPIN-F, pOPIN-S3C,  
239 pOPIN-M and pOPIN-E was performed as described by (Berrow et al., 2007). To clone AVR-  
240 PikF into the pOPIN-GG constructs, the AVR-PikF sequence was amplified with primers that  
241 introduced overhangs at the 5' and 3' of the sequence containing a *BsaI* Type IIS  
242 endonuclease sites (Table 1) which would reveal 5' CCAT and 3' GCTT overhangs or 5' AATG  
243 and 3' TTCG overhangs, for N-terminal tagged or C-terminal tagged constructs, respectively  
244 (Figure 1). AVR-PikF amplicons were subsequently used in a one-pot Golden Gate reaction  
245 (Engler et al., 2009, 2008) with the pPGN-C acceptor for N-terminal tagging or the pPGC-C  
246 for C-terminal tagging and desired N-/C-terminal tag-containing construct (Figure 1). Golden  
247 Gate reactions were then transformed into chemicompetent Stellar *E. coli* cells (Takara Bio)

248 and positive clones were identified via RFP selection before sequencing to confirm the cloning  
249 was successful.

250

251 *Small Scale Expression and Purification of differentially tagged AVR-PikF in pOPIN and*  
252 *pOPIN-GG vectors*

253 Constructs for protein expression were transformed into *E. coli* SHuffle cells (NEB) via heat  
254 shock. Protein expression was performed via autoinduction (Studier, 2005) under the required  
255 selection. Cells were harvested by centrifugation and resuspended in lysis buffer (50 mM  
256 HEPES pH 7.4, 500 mM NaCl, 30 mM imidazole, 5 mM glycine, 5% glycerol) at a ratio of 5:1  
257 buffer per gram of cell pellet. 8 mL of resuspended cells were transferred to a 24 well plate  
258 and lysed by sonication with a 24-tip sonication horn. Cell lysate was clarified by centrifugation  
259 at 45,000 *g* for 20 mins. 500  $\mu$ l of Ni-NTA resin (Qiagen) was added to each of the clarified  
260 cell lysates and incubated for 20 mins with gentle shaking. After incubation, cell lysates with  
261 Ni-NTA resin were transferred to 15 ml gravity flow columns and Ni-NTA resin was washed  
262 with 2 column volumes of lysis buffer to remove non-specific interactors. Proteins were eluted  
263 from the Ni-NTA resin with 1 mL of elution buffer (50 mM HEPES pH 7.4, 500 mM NaCl, 500  
264 mM imidazole). Samples were visualised by SDS-PAGE with 16 % Teo-tricine polyacrylamide  
265 gels (Abcam) stained with Instant Blue<sup>®</sup> Coomassie Stain (Abcam).

266

267 *Expression and purification of the AVR-PikF and OshIPP19 complex*

268 A 6xHIS-GB1-tagged OshIPP19 in pPGN-C was co-transformed with an untagged AVR-PikF  
269 in pPGC-K into *E. coli* SHuffle cells and plated on carbenicillin + kanamycin LB agar plates.  
270 Protein expression was performed via autoinduction (Studier, 2005) under carbenicillin +  
271 kanamycin selection. Cells were harvested by centrifugation and resuspended in lysis buffer  
272 (50 mM HEPES pH 7.4, 500 mM NaCl, 30 mM imidazole, 5 mM glycine, 5% glycerol) at a ratio  
273 of 5:1 buffer per gram of cell pellet. Cells were lysed via sonication and lysate was clarified by  
274 centrifugation at 45,000 *g*. Clarified lysate was then subjected to Nickel immobilised metal  
275 affinity chromatography (IMAC) followed by size exclusion chromatography (SEC) with a

276 Superdex S75 26/600. Fractions from SEC were visualised by SDS-PAGE with 16 % Teo-  
277 tricine polyacrylamide gels (Abcam) stained with Instant Blue<sup>®</sup> Coomassie Stain (Abcam).

278 **Acknowledgements**

279 We thank Ray Owens from the Oxford Protein Production Facility for provision of the pOPIN  
280 vectors. We thank Dr. Florian Altegoer for kindly providing pEMGB1 vector for the cloning of  
281 6xHIS-GB1 tag. This work was supported by UKRI-BBSRC (grant BB/P012574), UKRI-  
282 BBRSC Norwich Research Park Biosciences Doctoral Training Partnership, (grant  
283 BB/M011216/1, for FAV) and the ERC (proposal 743165), the ERAMUS<sup>+</sup> training programme,  
284 the John Innes Foundation and the Gatsby Charitable Foundation.

285

286 **Data Availability Statement**

287 All data supporting the findings of this study are contained within the manuscript. The pOPIN-  
288 GG vectors are available directly through Addgene  
289 ([https://www.addgene.org/Mark\\_Banfield/](https://www.addgene.org/Mark_Banfield/)).



## 290 References

- 291 Bentham, A.R., Petit-Houdenet, Y., Win, J., Chuma, I., Terauchi, R., Banfield, M.J., Kamoun,  
292 S., Langner, T., 2021. A single amino acid polymorphism in a conserved effector of  
293 the multihost blast fungus pathogen expands host-target binding spectrum. *BioRxiv*  
294 2021.03.15.435478. <https://doi.org/10.1101/2021.03.15.435478>
- 295 Berrow, N.S., Alderton, D., Sainsbury, S., Nettleship, J., Assenberg, R., Rahman, N., Stuart,  
296 D.I., Owens, R.J., 2007. A versatile ligation-independent cloning method suitable for  
297 high-throughput expression screening applications. *Nucleic Acids Res* 35, e45.  
298 <https://doi.org/10.1093/nar/gkm047>
- 299 di Guana, C., Lib, P., Riggsa, P.D., Inouyeb, H., 1988. Vectors that facilitate the expression  
300 and purification of foreign peptides in *Escherichia coli* by fusion to maltose-binding  
301 protein. *Gene* 67, 21–30. [https://doi.org/10.1016/0378-1119\(88\)90004-2](https://doi.org/10.1016/0378-1119(88)90004-2)
- 302 Engler, C., Gruetzner, R., Kandzia, R., Marillonnet, S., 2009. Golden Gate Shuffling: A One-  
303 Pot DNA Shuffling Method Based on Type IIs Restriction Enzymes. *PLOS ONE* 4,  
304 e5553. <https://doi.org/10.1371/journal.pone.0005553>
- 305 Engler, C., Kandzia, R., Marillonnet, S., 2008. A One Pot, One Step, Precision Cloning  
306 Method with High Throughput Capability. *PLOS ONE* 3, e3647.  
307 <https://doi.org/10.1371/journal.pone.0003647>
- 308 Engler, C., Youles, M., Gruetzner, R., Ehnert, T.-M., Werner, S., Jones, J.D.G., Patron, N.J.,  
309 Marillonnet, S., 2014. A Golden Gate Modular Cloning Toolbox for Plants. *ACS*  
310 *Synth. Biol.* 3, 839–843. <https://doi.org/10.1021/sb4001504>
- 311 Kobashigawa, Y., Kumeta, H., Ogura, K., Inagaki, F., 2009. Attachment of an NMR-invisible  
312 solubility enhancement tag using a sortase-mediated protein ligation method. *J*  
313 *Biomol NMR* 43, 145. <https://doi.org/10.1007/s10858-008-9296-5>
- 314 Longya, A., Chaipanya, C., Franceschetti, M., Maidment, J.H.R., Banfield, M.J.,  
315 Jantasuriyarat, C., 2019. Gene Duplication and Mutation in the Emergence of a  
316 Novel Aggressive Allele of the AVR-Pik Effector in the Rice Blast Fungus. *MPMI* 32,  
317 740–749. <https://doi.org/10.1094/MPMI-09-18-0245-R>
- 318 Maidment, J.H.R., Franceschetti, M., Maqbool, A., Saitoh, H., Jantasuriyarat, C., Kamoun,  
319 S., Terauchi, R., Banfield, M.J., 2021. Multiple variants of the fungal effector AVR-Pik  
320 bind the HMA domain of the rice protein OsHIPP19, providing a foundation to  
321 engineer plant defense. *Journal of Biological Chemistry* 296, 100371.  
322 <https://doi.org/10.1016/j.jbc.2021.100371>
- 323 Malakhov, M.P., Mattern, M.R., Malakhova, O.A., Drinker, M., Weeks, S.D., Butt, T.R., 2004.  
324 SUMO fusions and SUMO-specific protease for efficient expression and purification  
325 of proteins. *J Struct Func Genom* 5, 75–86.  
326 <https://doi.org/10.1023/B:JSFG.0000029237.70316.52>
- 327 Neuhold, J., Radakovics, K., Lehner, A., Weissmann, F., Garcia, M.Q., Romero, M.C.,  
328 Berrow, N.S., Stolt-Bergner, P., 2020. GoldenBac: a simple, highly efficient, and  
329 widely applicable system for construction of multi-gene expression vectors for use  
330 with the baculovirus expression vector system. *BMC Biotechnol* 20, 26.  
331 <https://doi.org/10.1186/s12896-020-00616-z>
- 332 Outram, M.A., Sung, Y.-C., Yu, D., Dagvadorj, B., Rima, S.A., Jones, D.A., Ericsson, D.J.,  
333 Sperschneider, J., Solomon, P.S., Kobe, B., Williams, S.J., 2021. The crystal  
334 structure of SnTox3 from the necrotrophic fungus *Parastagonospora nodorum*  
335 reveals a unique effector fold and provides insight into Snn3 recognition and pro-  
336 domain protease processing of fungal effectors. *New Phytologist* n/a.  
337 <https://doi.org/10.1111/nph.17516>
- 338 Padgett, K.A., Sorge, J.A., 1996. Creating seamless junctions independent of restriction  
339 sites in PCR cloning. *Gene* 168, 31–35. [https://doi.org/10.1016/0378-1119\(95\)00731-](https://doi.org/10.1016/0378-1119(95)00731-8)  
340 8
- 341 Patron, N.J., Orzaez, D., Marillonnet, S., Warzecha, H., Matthewman, C., Youles, M.,  
342 Raitskin, O., Leveau, A., Farré, G., Rogers, C., Smith, A., Hibberd, J., Webb, A.A.R.,  
343 Locke, J., Schornack, S., Ajioka, J., Baulcombe, D.C., Zipfel, C., Kamoun, S., Jones,

- 344 J.D.G., Kuhn, H., Robatzek, S., Esse, H.P.V., Sanders, D., Oldroyd, G., Martin, C.,  
345 Field, R., O'Connor, S., Fox, S., Wulff, B., Miller, B., Breakspear, A., Radhakrishnan,  
346 G., Delaux, P.-M., Loqué, D., Granell, A., Tissier, A., Shih, P., Brutnell, T.P., Quick,  
347 W.P., Rischer, H., Fraser, P.D., Aharoni, A., Raines, C., South, P.F., Ané, J.-M.,  
348 Hamberger, B.R., Langdale, J., Stougaard, J., Bouwmeester, H., Udvardi, M.,  
349 Murray, J.A.H., Ntoukakis, V., Schäfer, P., Denby, K., Edwards, K.J., Osbourn, A.,  
350 Haseloff, J., 2015. Standards for plant synthetic biology: a common syntax for  
351 exchange of DNA parts. *New Phytologist* 208, 13–19.  
352 <https://doi.org/10.1111/nph.13532>
- 353 Rosano, G.L., Ceccarelli, E.A., 2014. Recombinant protein expression in *Escherichia coli*:  
354 advances and challenges. *Front. Microbiol.* 5.  
355 <https://doi.org/10.3389/fmicb.2014.00172>
- 356 Studier, F.W., 2005. Protein production by auto-induction in high-density shaking cultures.  
357 *Protein Expression and Purification* 41, 207–234.  
358 <https://doi.org/10.1016/j.pep.2005.01.016>
- 359 Zhou, P., Wagner, G., 2010. Overcoming the Solubility Limit with Solubility-Enhancement  
360 Tags: Successful Applications in Biomolecular NMR Studies. *J Biomol NMR* 46, 23–  
361 31. <https://doi.org/10.1007/s10858-009-9371-6>

362 **Figures**

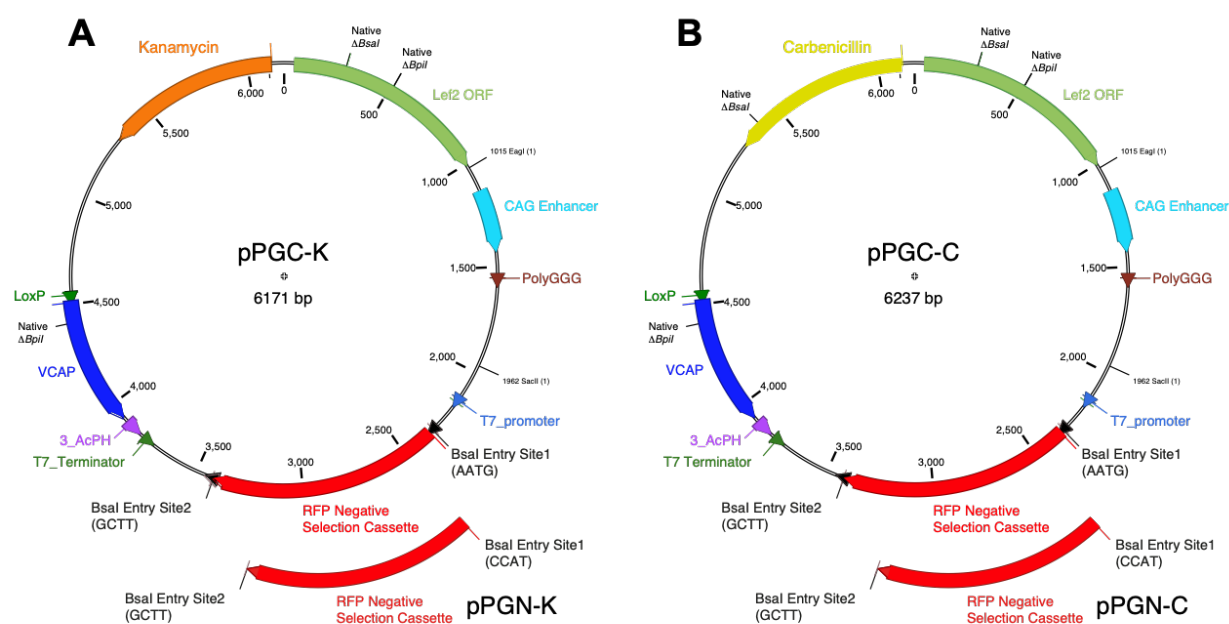

363 **Figure 1. Annotated vector maps of the pOPIN-GG acceptors.** pOPIN vectors pOPIN-A  
 364 and pOPIN-F were modified to generate four pOPIN-GG acceptors. **A)** pPGN-K and pPGC-K  
 365 are Kan<sup>R</sup> vectors descended from pOPIN-A for N-terminal and C-terminal tagging,  
 366 respectively. **B)** pPGN-C and pPGC-C are Carb<sup>R</sup> vectors descended from pOPIN-F for N-  
 367 terminal and C-terminal tagging, respectively.  $\Delta Bsal$  and  $\Delta Bpil$  represent domesticated *Bsal*  
 368 and *Bpil* sites to allow for Golden Gate cloning compatibility. An RFP negative selection  
 369 cassette was integrated into the backbone between the *Bsal* entry sites to allow for red/white  
 370 selection upon insertion of the GOI.

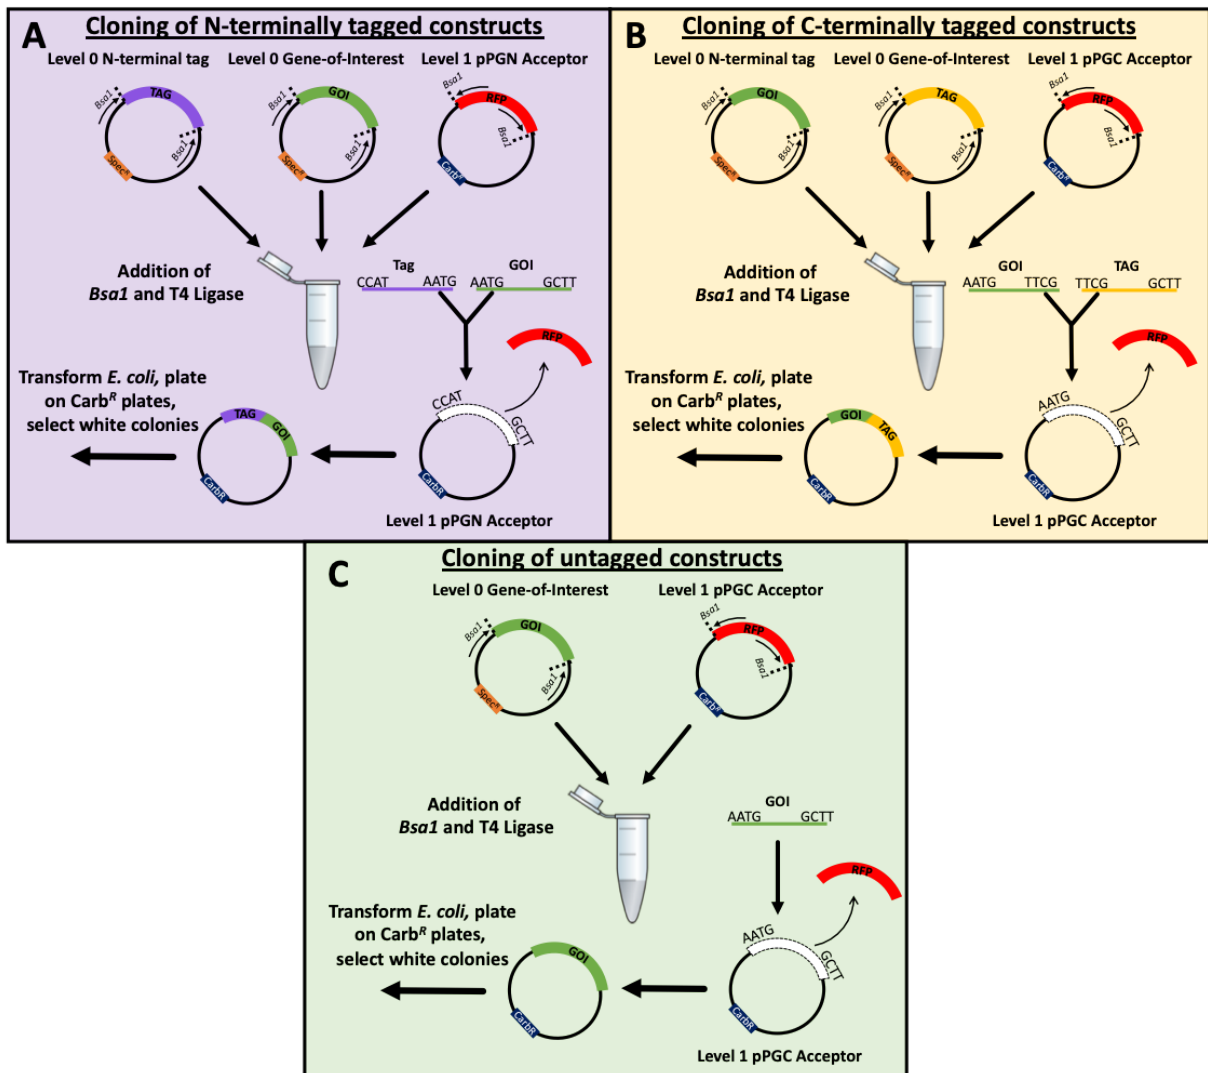

371 **Figure 2. Cloning strategy flowcharts.** The pOPIN-GG vectors enable N-terminally tagged,  
 372 C-terminally tagged, or untagged constructs. **A)** Cloning strategy for N-terminal tagging. GOI  
 373 requires overhangs 5' AATG and 3' GCTT which can be revealed from *BsaI* treatment of a  
 374 level 0 vector or added by PCR. The GOI can then be combined with one of the pPGN  
 375 acceptor and N-terminal tag level 0 vectors to generate an N-terminally tagged level 1  
 376 construct. **B)** Cloning strategy for C-terminal tagging. GOI requires overhangs 5' AATG and 3'  
 377 TTCG which can be revealed from *BsaI* treatment of a level 0 vector or added via PCR. The  
 378 GOI can then be combined with one of the pPGC acceptor and C-terminal tag level 0 vectors

379 to generate a C-terminally tagged level 1 construct. **C)** Cloning strategy for generating an  
380 untagged gene. As for N-terminal tagging, the GOI requires overhangs 5' AATG and 3' GCTT  
381 which can be revealed from *BsaI* treatment of a level 0 vector or added by PCR. However, is  
382 then combined with one of the pPGC vectors, resulting in an untagged GOI, useful in co-  
383 expression. Carb<sup>R</sup> level 1 acceptor vectors are shown for simplicity, Kan<sup>R</sup> level 1 acceptor  
384 vectors can be used instead as required.

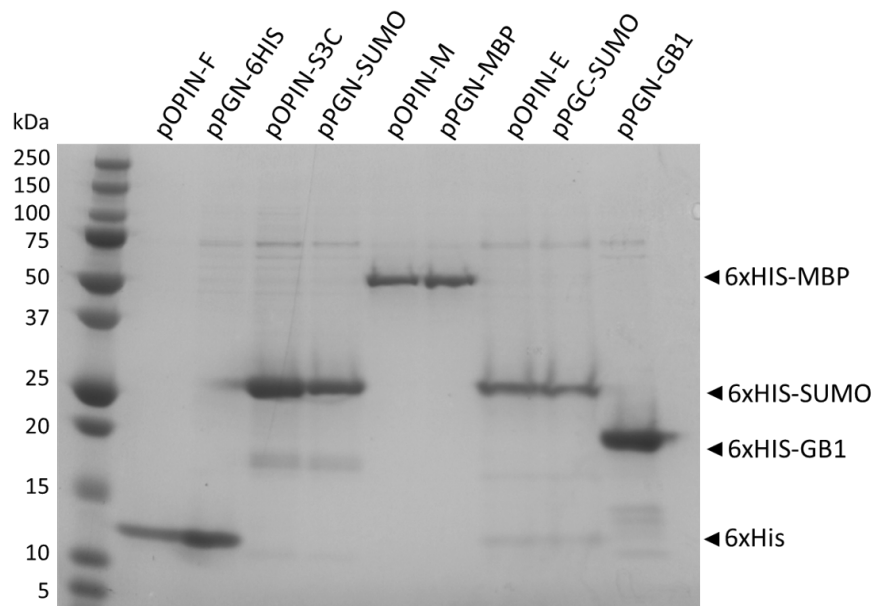

385 **Figure 3. Expression and purification of AVR-PikF in pOPIN vectors vs AVR-PikF in**  
386 **pOPIN-GG vectors.** AVR-PikF was cloned into the pOPIN vectors pOPIN-F, pOPIN-S3C,  
387 pOPIN-M, and pOPIN-E (with additional SUMO tag to aid solubility). The equivalent constructs  
388 were produced in the pOPIN-GG system, as well as an additional 6xHIS-GB1-tagged  
389 construct. Constructs were expressed in *E. coli* SHuffle cells and purified using Ni-NTA affinity  
390 resin before being visualised by SDS-PAGE.

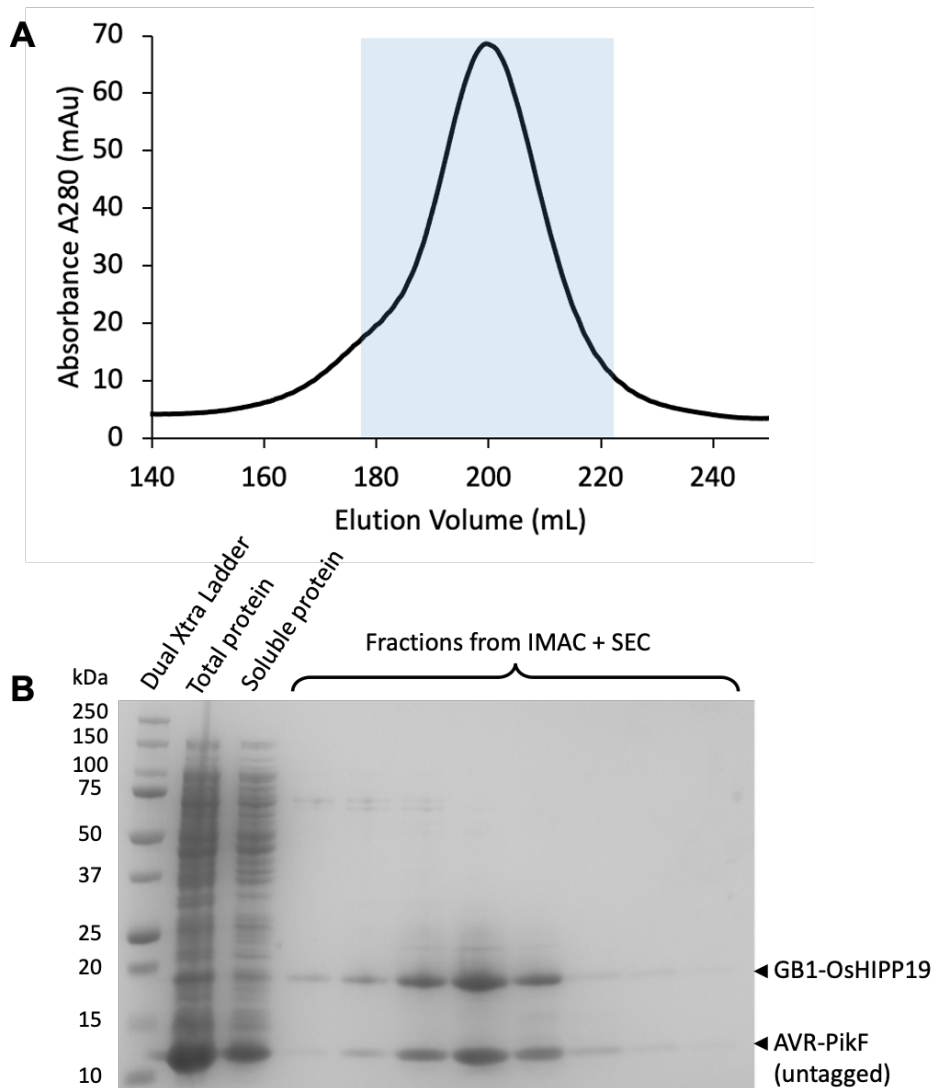

391 **Figure 4. Co-expression and purification of AVR-PikF and OsHIPP19 using the pOPIN-**  
392 **GG system.** An untagged construct of AVR-PikF was generated using pPGC-K and co-  
393 expressed with OsHIPP19 cloned with a 6xHIS-GB1 solubility tag in pPGN-C *E. coli* SHuffle  
394 cells. Constructs were purified using Ni<sup>2+</sup>-mediated immobilised metal affinity chromatography  
395 (IMAC) coupled with size exclusion chromatography (SEC) before visualised via SDS-PAGE.  
396 **A)** SEC chromatogram of the AVR-PikF / OsHIPP19 complex. Blue box indicates the fractions  
397 analysed by SDS-PAGE. **B)** Instant blue® Coomassie-stained SDS-PAGE gel of the fractions  
398 from SEC showing the co-elution of the AVR-PikF and OsHIPP19 proteins, indicating complex  
399 formation.

400 **Table 1. Overhang sequences for primers to clone tags and inserts into various**  
 401 **acceptors.**

| <b><u>Overhangs for primers to clone GOI into level 0 acceptor</u></b>   |                    |
|--------------------------------------------------------------------------|--------------------|
| GOI Forward AATG Bpil                                                    | AAA GAAGAC CG AATG |
| N-tagging GOI Reverse GCTT Bpil                                          | AAA GAAGAC CG AAGC |
| C-tagging GOI Reverse TTCG Bpil                                          | AAA GAAGAC CG CGAA |
| <b><u>Overhangs for primers to clone N-tag into level 0 acceptor</u></b> |                    |
| N-tag Forward CCAT Bpil                                                  | AAA GAAGAC CG CCAT |
| N-tag Reverse AATG Bpil                                                  | AAA GAAGAC CG CATT |
| <b><u>Overhangs for primers to clone C-tag into level 0 acceptor</u></b> |                    |
| N-tag Forward TTCG Bpil                                                  | AAA GAAGAC CG TTCG |
| N-tag Reverse GCTT Bpil                                                  | AAA GAAGAC CG AAGC |
| <b><u>Overhangs for primers to clone GOI into pOPIN-GG acceptors</u></b> |                    |
| GOI Forward AATG Bsal                                                    | AAA GGTCTC A AATG  |
| N-tagging GOI Reverse GCTT Bsal                                          | AAA GGTCTC A AAGC  |
| C-tagging insert Reverse TTCG Bsal                                       | AAA GGTCTC A CGAA  |

Bpil site     
  Bsal site     
  GG Overhang



402 **Table 2. pOPIN-GG acceptors and compatible vectors available on Addgene**

| Vectors                                                        | Description                                          | 5' Overhang | 3' Overhang | Selection                | Addgene ID |
|----------------------------------------------------------------|------------------------------------------------------|-------------|-------------|--------------------------|------------|
| <b><u>Level 0 acceptors for making level 0 modules</u></b>     |                                                      |             |             |                          |            |
| pICH41308                                                      | Acceptor for CDS to be N-tagged                      | AATG        | GCTT        | Spectinomycin            | 174574     |
| pICSL01005                                                     | Acceptor for CDS to be C-tagged                      | AATG        | TTCG        | Spectinomycin            | 174575     |
| pICSL01002                                                     | Acceptor for creating N-tag modules                  | CCAT        | AATG        | Spectinomycin            | 174576     |
| pICSL01003                                                     | Acceptor for creating C-tag modules                  | TTCG        | GCTT        | Spectinomycin            | 174577     |
| <b><u>Level 1 acceptors for protein expression</u></b>         |                                                      |             |             |                          |            |
| pPGN-C                                                         | Expression vector compatible with N-terminal tagging | CCAT        | GCTT        | Carbenicillin/Ampicillin | 174578     |
| pPGN-K                                                         | Expression vector compatible with N-terminal tagging | CCAT        | GCTT        | Kanamycin                | 174579     |
| pPGC-C                                                         | Expression vector compatible with C-terminal tagging | AATG        | GCTT        | Carbenicillin/Ampicillin | 174580     |
| pPGC-K                                                         | Expression vector compatible with C-terminal tagging | AATG        | GCTT        | Kanamycin                | 174581     |
| <b><u>Premade level 0 modules encoding N-terminal tags</u></b> |                                                      |             |             |                          |            |
| pICSL30015                                                     | 6xHIS-MBP-3C                                         | CCAT        | AATG        | Spectinomycin            | 174582     |
| pICSL30017                                                     | 6xHIS uncleavable                                    | CCAT        | AATG        | Spectinomycin            | 174583     |
| pICSL30018                                                     | 6xHIS -SUMO-3C                                       | CCAT        | AATG        | Spectinomycin            | 174584     |
| pICSL30019                                                     | 6xHIS-3C                                             | CCAT        | AATG        | Spectinomycin            | 174585     |
| pICSL30022                                                     | Twin Streptavidin uncleavable                        | CCAT        | AATG        | Spectinomycin            | 174586     |
| pICSL30028                                                     | 6xHIS-GB1                                            | CCAT        | AATG        | Spectinomycin            | 174587     |
| <b><u>Premade level 0 modules encoding C-terminal tags</u></b> |                                                      |             |             |                          |            |
| pICSL50001                                                     | 6xHIS-TEV-3xFLAG                                     | TTCG        | GCTT        | Spectinomycin            | 174588     |
| pICSL50025                                                     | 6xHIS uncleavable                                    | TTCG        | GCTT        | Spectinomycin            | 174589     |
| pICSL50026                                                     | 3C-6xHIS                                             | TTCG        | GCTT        | Spectinomycin            | 174590     |
| pICSL50027                                                     | Twin Streptavidin uncleavable                        | TTCG        | GCTT        | Spectinomycin            | 174591     |
